# Supplementary material for: Bright and stable luminescent probes for target engagement profiling in live cells
Source: Springer Nature journal article supplement (doi:10.1038/s41589-021-00877-5), 2021-10-21
Supplement: 41589_2021_877_MOESM79_ESM.mol [file 41589_2021_877_MOESM79_ESM.mol]

nchembio.A210212766C-comp40.mol
  ChemDraw08052115582D

 16 15  0  0  0  0  0  0  0  0999 V2000
   -1.0717   -0.2062    0.0000 N   0  0  0  0  0  0  0  0  0  0  0  0
   -0.3572    0.2063    0.0000 C   0  0  0  0  0  0  0  0  0  0  0  0
    0.3572   -0.2062    0.0000 C   0  0  0  0  0  0  0  0  0  0  0  0
    1.0717    0.2063    0.0000 N   0  0  0  0  0  0  0  0  0  0  0  0
   -1.7862    0.2063    0.0000 C   0  0  0  0  0  0  0  0  0  0  0  0
   -2.5007   -0.2062    0.0000 C   0  0  0  0  0  0  0  0  0  0  0  0
   -1.0717   -1.0312    0.0000 C   0  0  0  0  0  0  0  0  0  0  0  0
   -0.3572   -1.4438    0.0000 C   0  0  0  0  0  0  0  0  0  0  0  0
    1.7862   -0.2062    0.0000 C   0  0  0  0  0  0  0  0  0  0  0  0
    2.5006    0.2063    0.0000 C   0  0  0  0  0  0  0  0  0  0  0  0
    1.0717    1.0313    0.0000 C   0  0  0  0  0  0  0  0  0  0  0  0
    0.3572    1.4438    0.0000 C   0  0  0  0  0  0  0  0  0  0  0  0
   -3.2151    0.2063    0.0000 N   0  0  0  0  0  0  0  0  0  0  0  0
    3.2151   -0.2062    0.0000 N   0  0  0  0  0  0  0  0  0  0  0  0
   -0.3572   -2.2688    0.0000 N   0  0  0  0  0  0  0  0  0  0  0  0
    0.3572    2.2688    0.0000 N   0  0  0  0  0  0  0  0  0  0  0  0
  1  2  1  0      
  2  3  1  0      
  3  4  1  0      
  1  5  1  0      
  5  6  1  0      
  1  7  1  0      
  7  8  1  0      
  4  9  1  0      
  9 10  1  0      
  4 11  1  0      
 11 12  1  0      
  6 13  1  0      
 10 14  1  0      
  8 15  1  0      
 12 16  1  0      
M  END
