# Supplementary material for: Bright and stable luminescent probes for target engagement profiling in live cells
Source: Springer Nature journal article supplement (doi:10.1038/s41589-021-00877-5), 2021-10-21
Supplement: 41589_2021_877_MOESM91_ESM.mol [file 41589_2021_877_MOESM91_ESM.mol]

nchembio.A210212766C-comp46.mol
  ChemDraw08052115582D

 24 25  0  0  0  0  0  0  0  0999 V2000
   -2.1434   -0.6188    0.0000 C   0  0  0  0  0  0  0  0  0  0  0  0
   -2.1434   -1.4438    0.0000 C   0  0  0  0  0  0  0  0  0  0  0  0
   -1.4289   -1.8563    0.0000 C   0  0  0  0  0  0  0  0  0  0  0  0
   -0.7145   -1.4438    0.0000 C   0  0  0  0  0  0  0  0  0  0  0  0
   -0.7145   -0.6188    0.0000 C   0  0  0  0  0  0  0  0  0  0  0  0
   -1.4289   -0.2063    0.0000 C   0  0  0  0  0  0  0  0  0  0  0  0
   -2.8579   -0.2063    0.0000 C   0  0  0  0  0  0  0  0  0  0  0  0
    0.0000   -0.2063    0.0000 C   0  0  0  0  0  0  0  0  0  0  0  0
   -3.5724   -0.6187    0.0000 O   0  0  0  0  0  0  0  0  0  0  0  0
   -2.8579    0.6187    0.0000 O   0  0  0  0  0  0  0  0  0  0  0  0
    0.7145   -0.6187    0.0000 O   0  0  0  0  0  0  0  0  0  0  0  0
   -0.0000    0.6187    0.0000 O   0  0  0  0  0  0  0  0  0  0  0  0
    1.4289   -0.2062    0.0000 C   0  0  0  0  0  0  0  0  0  0  0  0
    2.1434   -0.6187    0.0000 C   0  0  0  0  0  0  0  0  0  0  0  0
    2.8579   -0.2062    0.0000 C   0  0  0  0  0  0  0  0  0  0  0  0
    2.8579    0.6188    0.0000 C   0  0  0  0  0  0  0  0  0  0  0  0
    2.1434    1.0313    0.0000 C   0  0  0  0  0  0  0  0  0  0  0  0
    2.1434   -1.4437    0.0000 F   0  0  0  0  0  0  0  0  0  0  0  0
    3.5724   -0.6187    0.0000 F   0  0  0  0  0  0  0  0  0  0  0  0
    2.1434    1.8563    0.0000 F   0  0  0  0  0  0  0  0  0  0  0  0
    1.4289    0.6188    0.0000 C   0  0  0  0  0  0  0  0  0  0  0  0
    0.7145    1.0313    0.0000 F   0  0  0  0  0  0  0  0  0  0  0  0
   -1.4289    0.6187    0.0000 O   0  0  0  0  0  0  0  0  0  0  0  0
   -2.1386    1.0285    0.0000 C   0  0  0  0  0  0  0  0  0  0  0  0
 23 24  1  0      
  6 23  1  0      
  1  2  2  0      
  2  3  1  0      
  3  4  2  0      
  4  5  1  0      
  5  6  2  0      
  6  1  1  0      
  1  7  1  0      
  5  8  1  0      
  7  9  1  0      
  7 10  2  0      
  8 11  1  0      
  8 12  2  0      
 11 13  1  0      
 13 14  2  0      
 14 15  1  0      
 15 16  2  0      
 16 17  1  0      
 17 21  2  0      
 21 13  1  0      
 14 18  1  0      
 15 19  1  0      
 17 20  1  0      
 21 22  1  0      
M  STY  1   1 SUP
M  SLB  1   1   1
M  SAL   1  2  23  24
M  SBL   1  1   2
M  SMT   1 OMe
M  SBV   1   2    0.0000   -0.8250
M  END
