# Supplementary material for: Bright and stable luminescent probes for target engagement profiling in live cells
Source: Springer Nature journal article supplement (doi:10.1038/s41589-021-00877-5), 2021-10-21
Supplement: 41589_2021_877_MOESM93_ESM.mol [file 41589_2021_877_MOESM93_ESM.mol]

nchembio.A210212766C-comp47.mol
  ChemDraw08052115582D

 25 26  0  0  0  0  0  0  0  0999 V2000
   -2.1434   -0.2081    0.0000 C   0  0  0  0  0  0  0  0  0  0  0  0
   -2.1434   -1.0331    0.0000 C   0  0  0  0  0  0  0  0  0  0  0  0
   -1.4289   -1.4456    0.0000 C   0  0  0  0  0  0  0  0  0  0  0  0
   -0.7145   -1.0331    0.0000 C   0  0  0  0  0  0  0  0  0  0  0  0
   -0.7145   -0.2081    0.0000 C   0  0  0  0  0  0  0  0  0  0  0  0
   -1.4289    0.2044    0.0000 C   0  0  0  0  0  0  0  0  0  0  0  0
   -2.8579    0.2044    0.0000 C   0  0  0  0  0  0  0  0  0  0  0  0
    0.0000    0.2044    0.0000 C   0  0  0  0  0  0  0  0  0  0  0  0
   -1.4289    1.0294    0.0000 O   0  0  0  0  0  0  0  0  0  0  0  0
   -2.1434    1.4419    0.0000 C   0  0  0  0  0  0  0  0  0  0  0  0
   -3.5724   -0.2081    0.0000 O   0  0  0  0  0  0  0  0  0  0  0  0
   -2.8579    1.0294    0.0000 O   0  0  0  0  0  0  0  0  0  0  0  0
    0.7145   -0.2081    0.0000 O   0  0  0  0  0  0  0  0  0  0  0  0
   -0.0000    1.0294    0.0000 O   0  0  0  0  0  0  0  0  0  0  0  0
    1.4289    0.2044    0.0000 C   0  0  0  0  0  0  0  0  0  0  0  0
    2.1434   -0.2081    0.0000 C   0  0  0  0  0  0  0  0  0  0  0  0
    2.8579    0.2044    0.0000 C   0  0  0  0  0  0  0  0  0  0  0  0
    2.8579    1.0294    0.0000 C   0  0  0  0  0  0  0  0  0  0  0  0
    2.1434    1.4419    0.0000 C   0  0  0  0  0  0  0  0  0  0  0  0
    2.1434   -1.0331    0.0000 F   0  0  0  0  0  0  0  0  0  0  0  0
    3.5724   -0.2081    0.0000 F   0  0  0  0  0  0  0  0  0  0  0  0
    2.1434    2.2669    0.0000 F   0  0  0  0  0  0  0  0  0  0  0  0
    1.4289    1.0294    0.0000 C   0  0  0  0  0  0  0  0  0  0  0  0
    0.7145    1.4419    0.0000 F   0  0  0  0  0  0  0  0  0  0  0  0
   -1.4289   -2.2669    0.0000 Cl  0  0  0  0  0  0  0  0  0  0  0  0
  1  2  2  0      
  2  3  1  0      
  3  4  2  0      
  4  5  1  0      
  5  6  2  0      
  6  1  1  0      
  1  7  1  0      
  5  8  1  0      
  6  9  1  0      
  9 10  1  0      
  7 11  1  0      
  7 12  2  0      
  8 13  1  0      
  8 14  2  0      
 13 15  1  0      
 15 16  2  0      
 16 17  1  0      
 17 18  2  0      
 18 19  1  0      
 19 23  2  0      
 23 15  1  0      
 16 20  1  0      
 17 21  1  0      
 19 22  1  0      
 23 24  1  0      
  3 25  1  0      
M  END
